# Supplementary material for: Teratogenic, Oxidative Stress and Behavioural Outcomes of Three Fungicides of Natural Origin (Equisetum arvense, Mimosa tenuiflora, Thymol) on Zebrafish (Danio rerio)
Source: PubMed Central journal article supplement (PMC7827758; doi:10.3390/toxics9010008), 2021-01-09
Supplement: toxics-09-00008-s001.pdf [file toxics-09-00008-s001.pdf]

# Supplementary Materials: Teratogenic, Oxidative Stress and Behavioural Outcomes of Three Fungicides of Natural Origin (*Equisetum arvense*, *Mimosa tenuiflora*, Thymol) on Zebrafish (*Danio rerio*)

Raquel Vieira <sup>1</sup>, Carlos Venâncio <sup>1,2</sup> and Luís Félix <sup>1,3,4,\*</sup>

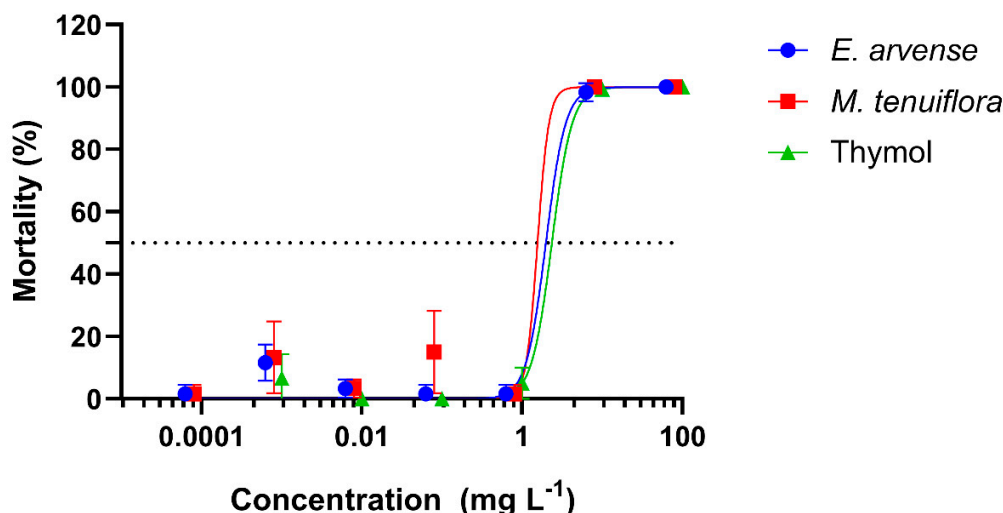

Figure S1.

Table S1. Sublethal effects of the different exposures on the development of zebrafish embryos.

| Phyto-fungicide                  | Group | 24 hpf            |                   |                   | 48 hpf             |                        |                               | 72 hpf                                 |
|----------------------------------|-------|-------------------|-------------------|-------------------|--------------------|------------------------|-------------------------------|----------------------------------------|
|                                  |       | Tail Not Detached | Head Not Detached | Somite Not Formed | Eyes Not Developed | Otoliths Not Developed | Blood Circulation Not Visible | Oedema Presence (Yolk Sac and Cardiac) |
| <i>Equisetum arvense</i> extract | Ctrl  | nd                | nd                | nd                | nd                 | nd                     | nd                            | nd                                     |
|                                  | E1    | nd                | nd                | nd                | nd                 | nd                     | nd                            | nd                                     |
|                                  | E2    | nd                | nd                | nd                | nd                 | nd                     | nd                            | nd                                     |
|                                  | E3    | nd                | nd                | nd                | nd                 | nd                     | nd                            | nd                                     |
| <i>Mimosa tenuiflora</i> extract | Ctrl  | nd                | nd                | nd                | nd                 | nd                     | nd                            | nd                                     |
|                                  | M1    | nd                | nd                | nd                | nd                 | nd                     | nd                            | nd                                     |
|                                  | M2    | nd                | nd                | nd                | nd                 | nd                     | nd                            | nd                                     |
| Thymol                           | M3    | nd                | nd                | nd                | nd                 | nd                     | nd                            | nd                                     |
|                                  | Ctrl  | nd                | nd                | nd                | nd                 | nd                     | nd                            | 0.00 (0.00–5.00)                       |
|                                  | T1    | nd                | nd                | nd                | nd                 | nd                     | nd                            | 0.00 (0.00–10.0)                       |
|                                  | T2    | nd                | nd                | nd                | nd                 | nd                     | nd                            | 0.00 (0.00–10.0)                       |
|                                  | T3    | nd                | nd                | nd                | nd                 | nd                     | nd                            | 0.00 (0.00–0.00)                       |

Non-parametric data presented as median and interquartile range of five independent replicates. Statistical analysis was performed using the Kruskal–Wallis test followed by Dunn’s test ( $p < 0.05$ ). nd—not detected

**Table S2.** Biochemical parameters evaluated at 98 hpf in zebrafish embryos exposed to *Equisetum arvense* extract.

| Test Parameter                                                        | Exposure Group                                 |                                                 |                                                   |                                                    | Statistical Test                | <i>p</i> -Value |
|-----------------------------------------------------------------------|------------------------------------------------|-------------------------------------------------|---------------------------------------------------|----------------------------------------------------|---------------------------------|-----------------|
|                                                                       | Ctrl                                           | E1                                              | E2                                                | E3                                                 |                                 |                 |
| ROS ( $\mu\text{mol DCF mg protein}^{-1}$ )                           | 64.5 $\pm$ 16.1                                | 83.7 $\pm$ 20.8                                 | 66.1 $\pm$ 15.8                                   | 70.9 $\pm$ 20.8                                    | F(3,16) = 1.106                 | 0.376           |
| SOD (U mg protein <sup>-1</sup> )                                     | 105.6 (103.0–143.4)                            | 142.0 (126.8–153.8)                             | 122.9 (106.6–139.3)                               | 119.8 (109.1–147.6)                                | X <sup>2</sup> (3) = 3.600      | 0.308           |
| CAT (U mg protein <sup>-1</sup> )                                     | 0.5 (0.4–0.6)                                  | 0.3 (0.1–0.4)                                   | 0.2 (0.2–0.4)                                     | 0.3 (0.2–0.5)                                      | X <sup>2</sup> (3) = 5.094      | 0.165           |
| GPx (nmol NADPH min <sup>-1</sup> mg protein <sup>-1</sup> )          | <b>3.2 (2.0–9.3)</b> <sup>a,b</sup>            | <b>4.5 (2.6–6.3)</b> <sup>a,b</sup>             | <b>9.4 (7.5–11.3)</b> <sup>a</sup>                | <b>1.6 (1.1–5.4)</b> <sup>b</sup>                  | <b>X<sup>2</sup>(3) = 8.623</b> | <b>0.035</b>    |
| GR (nmol NADPH min <sup>-1</sup> mg protein <sup>-1</sup> )           | <b>9.1 (5.5–12.7)</b> <sup>a,b</sup>           | <b>21.0 (17.7–26.0)</b> <sup>b</sup>            | <b>17.4 (12.5–23.5)</b> <sup>a,b</sup>            | <b>6.1 (2.3–11.9)</b> <sup>a</sup>                 | <b>X<sup>2</sup>(3) = 12.27</b> | <b>0.007</b>    |
| GSH ( $\mu\text{mol GSH mg protein}^{-1}$ )                           | 28.1 $\pm$ 11.7                                | 14.9 $\pm$ 4.0                                  | 19.3 $\pm$ 9.0                                    | 23.5 $\pm$ 2.1                                     | F(3,15) = 2.701                 | 0.083           |
| GSSG ( $\mu\text{mol GSSG mg protein}^{-1}$ )                         | 28.2 (17.1–33.6)                               | 12.8 (9.45–17.8)                                | 13.9 (8.65–21.0)                                  | 20.2 (15.9–23.7)                                   | X <sup>2</sup> (3) = 7.000      | 0.072           |
| GSH:GSSG                                                              | 1.3 (1.0–1.4)                                  | 1.1 (1.0–1.3)                                   | 1.4 (1.1–1.5)                                     | 1.3 (1.1–1.4)                                      | X <sup>2</sup> (3) = 3.076      | 0.380           |
| GST ( $\mu\text{mol CDNB min}^{-1}$ mg protein <sup>-1</sup> )        | 3.4 $\pm$ 1.0                                  | 2.2 $\pm$ 0.5                                   | 2.5 $\pm$ 0.8                                     | 2.9 $\pm$ 0.5                                      | F(3,16) = 2.414                 | 0.105           |
| CarE (nmol 4-nitrophenol min <sup>-1</sup> mg protein <sup>-1</sup> ) | 14.1 $\pm$ 5.5                                 | 18.4 $\pm$ 3.7                                  | 17.0 $\pm$ 3.63                                   | 14.2 $\pm$ 3.3                                     | F(3,16) = 2.000                 | 0.155           |
| LPO ( $\mu\text{mol MDA mg protein}^{-1}$ )                           | 0.6 (0.4–1.1)                                  | 0.8 (0.4–1.1)                                   | 1.2 (0.7–1.3)                                     | 1.0 (0.8–1.1)                                      | X <sup>2</sup> (3) = 2.657      | 0.448           |
| AChE (nmol TNB min <sup>-1</sup> mg protein <sup>-1</sup> )           | <b>75.0 <math>\pm</math> 16.3</b> <sup>a</sup> | <b>167.8 <math>\pm</math> 21.7</b> <sup>b</sup> | <b>146.6 <math>\pm</math> 80.6</b> <sup>a,b</sup> | <b>157.9 <math>\pm</math> 049.4</b> <sup>a,b</sup> | <b>F(3,16) = 3.526</b>          | <b>0.039</b>    |
| LDH (nmol NADH min <sup>-1</sup> mg protein <sup>-1</sup> )           | 133.3 (105.4–145.1)                            | 133.6 (109.1–150.6)                             | 117.8 (110.6–149.0)                               | 85.5 (78.1–119.5)                                  | X <sup>2</sup> (3) = 4.687      | 0.196           |

Data from five independent replicates expressed as mean  $\pm$  SD for parametric data distribution or median and interquartile range for non-parametric data. Statistical analysis was performed using one-way ANOVA followed by Tukey's multiple-comparison test or Kruskal-Wallis followed by Dunn's test. Different lowercase letters indicate significant differences between groups ( $p < 0.05$ ).

**Table S3.** Biochemical parameters evaluated at 98 hpf in zebrafish embryos exposed to *Mimosa tenuiflora* extract.

| Test Parameter                                                        | Exposure Group      |                    |                     |                     | Statistical Test           | <i>p</i> -Value |
|-----------------------------------------------------------------------|---------------------|--------------------|---------------------|---------------------|----------------------------|-----------------|
|                                                                       | Ctrl                | M1                 | M2                  | M3                  |                            |                 |
| ROS ( $\mu\text{mol DCF mg protein}^{-1}$ )                           | 28.6 $\pm$ 14.0     | 11.5 $\pm$ 3.8     | 22.3 $\pm$ 8.3      | 27.9 $\pm$ 8.4      | F(3,16) = 2.101            | 0.140           |
| SOD (U mg protein <sup>-1</sup> )                                     | 169.5 (104.3–278.3) | 110.3 (78.4–222.2) | 241.7 (180.5–278.4) | 131.6 (126.3–204.4) | X <sup>2</sup> (3) = 4.509 | 0.212           |
| CAT (U mg protein <sup>-1</sup> )                                     | 0.2 $\pm$ 0.1       | 0.3 $\pm$ 0.1      | 0.3 $\pm$ 0.1       | 0.3 $\pm$ 0.1       | F(3,16) = 0.571            | 0.642           |
| GPx (nmol NADPH min <sup>-1</sup> mg protein <sup>-1</sup> )          | 5.6 $\pm$ 4.3       | 14.2 $\pm$ 7.1     | 13.9 $\pm$ 5.9      | 7.9 $\pm$ 4.6       | F(3,16) = 2.960            | 0.063           |
| GR (nmol NADPH min <sup>-1</sup> mg protein <sup>-1</sup> )           | 19.1 $\pm$ 9.5      | 16.6 $\pm$ 8.1     | 20.7 $\pm$ 15.0     | 14.6 $\pm$ 6.0      | F(3,16) = 0.344            | 0.794           |
| GSH ( $\mu\text{mol GSH mg protein}^{-1}$ )                           | 5.5 (4.3–8.7)       | 7.1 (6.6–21.2)     | 4.5 (4.2–8.8)       | 6.9 (5.0–13.8)      | X <sup>2</sup> (3) = 5.583 | 0.134           |
| GSSG ( $\mu\text{mol GSSG mg protein}^{-1}$ )                         | 6.1 (3.4–7.5)       | 4.2 (2.4–10.3)     | 2.0 (1.9–6.8)       | 5.9 (2.9–9.4)       | X <sup>2</sup> (3) = 2.154 | 0.541           |
| GSH:GSSG                                                              | 1.2 (0.8–1.6)       | 2.4 (1.5–3.1)      | 2.1 (1.5–2.3)       | 1.8 (1.0–1.9)       | X <sup>2</sup> (3) = 7.834 | 0.050           |
| GST (nmol CDNB min <sup>-1</sup> mg protein <sup>-1</sup> )           | 31.7 (22.9–54.5)    | 26.6 (10.1–28.4)   | 32.2 (11.5–34.6)    | 24.5 (10.9–36.2)    | X <sup>2</sup> (3) = 3.537 | 0.316           |
| CarE (nmol 4-nitrophenol min <sup>-1</sup> mg protein <sup>-1</sup> ) | 7.6 (6.8–8.9)       | 7.2 (4.5–8.5)      | 7.6 (4.1–7.9)       | 7.6 (5.9–10.0)      | X <sup>2</sup> (3) = 1.196 | 0.754           |
| LPO ( $\mu\text{mol MDA mg protein}^{-1}$ )                           | 0.4 (0.3–0.4)       | 0.4 (0.3–1.1)      | 0.2 (0.2–0.4)       | 0.4 (0.3–0.6)       | X <sup>2</sup> (3) = 3.754 | 0.289           |
| AChE (nmol TNB min <sup>-1</sup> mg protein <sup>-1</sup> )           | 32.7 $\pm$ 7.5      | 42.8 $\pm$ 3.1     | 44.4 $\pm$ 14.2     | 53.3 $\pm$ 22.6     | F(3,16) = 1.829            | 0.183           |
| LDH (nmol NADH min <sup>-1</sup> mg protein <sup>-1</sup> )           | 109.2 $\pm$ 22.3    | 83.9 $\pm$ 24.1    | 101.6 $\pm$ 21.8    | 92.0 $\pm$ 42.5     | F(3,16) = 0.730            | 0.549           |

Data from five independent replicates expressed as mean  $\pm$  SD for parametric data distribution or median and interquartile range for non-parametric data. Statistical analysis was performed using one-way ANOVA followed by Tukey's multiple-comparison test or Kruskal-Wallis followed by Dunn's test.

**Table S4.** Biochemical parameters evaluated at 98 hpf in zebrafish embryos exposed to Thymol.

| Test Parameter                                                        | Exposure Group                      |                                       |                                       |                                     | Statistical Test                | p-Value          |
|-----------------------------------------------------------------------|-------------------------------------|---------------------------------------|---------------------------------------|-------------------------------------|---------------------------------|------------------|
|                                                                       | Ctrl                                | M1                                    | M2                                    | M3                                  |                                 |                  |
| ROS (µmol DCF mg protein <sup>-1</sup> )                              | 23.8 ± 4.0                          | 23.6 ± 5.0                            | 18.5 ± 5.6                            | 29.0 ± 7.1                          | F(3,16) = 3.051                 | 0.059            |
| SOD (U mg protein <sup>-1</sup> )                                     | 138.1 ± 76.0                        | 179.8 ± 70.1                          | 70.9 ± 18.0                           | 110.9 ± 72.3                        | F(3,16) = 2.589                 | 0.089            |
| CAT (U mg protein <sup>-1</sup> )                                     | 0.5 ± 0.2                           | 0.3 ± 0.2                             | 0.4 ± 0.2                             | 0.2 ± 0.0                           | F(3,16) = 2.133                 | 0.136            |
| GPx (nmol NADPH min <sup>-1</sup> mg protein <sup>-1</sup> )          | 8.3 (3.2–13.5)                      | 18.9 (11.7–26.2)                      | 10.8 (7.5–13.8)                       | 12.3 (9.8–14.7)                     | X <sup>2</sup> (3) = 7.286      | 0.063            |
| GR (nmol NADPH min <sup>-1</sup> mg protein <sup>-1</sup> )           | 8.9 (6.9–12.8)                      | 18.5 (11.9–25.0)                      | 16.0 (9.8–16.3)                       | 16.2 (15.4–19.9)                    | X <sup>2</sup> (3) = 7.844      | 0.066            |
| GSH (µmol GSH mg protein <sup>-1</sup> )                              | 10.6 (5.5–17.4)                     | 11.7 (7.6–18.1)                       | 24.9 (16.9–38.6)                      | 14.8 (8.8–22.1)                     | X <sup>2</sup> (3) = 6.337      | 0.096            |
| GSSG (µmol GSSG mg protein <sup>-1</sup> )                            | 10.7 ± 2.9                          | 5.9 ± 3.7                             | 11.7 ± 3.7                            | 8.1 ± 3.2                           | F(3,16) = 3.048                 | 0.059            |
| GSH:GSSG                                                              | <b>1.0 ± 0.3<sup>a</sup></b>        | <b>2.3 ± 0.4<sup>b</sup></b>          | <b>2.3 ± 0.5<sup>b</sup></b>          | <b>1.8 ± 0.4<sup>b</sup></b>        | <b>F(3,16) = 11.21</b>          | <b>&lt;0.001</b> |
| GST (nmol CDNB min <sup>-1</sup> mg protein <sup>-1</sup> )           | <b>17.7 (12.2–21.9)<sup>a</sup></b> | <b>23.4 (19.4–28.2)<sup>a,b</sup></b> | <b>23.8 (21.6–25.1)<sup>a,b</sup></b> | <b>32.6 (26.3–37.3)<sup>b</sup></b> | <b>X<sup>2</sup>(3) = 12.60</b> | <b>0.006</b>     |
| CarE (nmol 4-nitrophenol min <sup>-1</sup> mg protein <sup>-1</sup> ) | 6.7 ± 2.7                           | 7.4 ± 4.8                             | 5.0 ± 1.5                             | 7.4 ± 2.7                           | F(3,16) = 0.654                 | 0.592            |
| LPO (µmol MDA mg protein <sup>-1</sup> )                              | 0.6 (0.2–1.1)                       | 0.4 (0.3–0.8)                         | 0.8 (0.5–1.5)                         | 0.5 (0.3–1.0)                       | X <sup>2</sup> (3) = 2.726      | 0.436            |
| AChE (nmol TNB min <sup>-1</sup> mg protein <sup>-1</sup> )           | 32.5 (22.8–33.5)                    | 30.5 (28.4–44.4)                      | 27.8 (25.7–37.2)                      | 33.9 (28.1–39.1)                    | X <sup>2</sup> (3) = 2.360      | 0.501            |
| LDH (nmol NADH min <sup>-1</sup> mg protein <sup>-1</sup> )           | 93.4 ± 27.0                         | 94.7 ± 12.9                           | 88.6 ± 15.2                           | 109.9 ± 49.6                        | F(3,16) = 0.474                 | 0.705            |

Data from five independent replicates expressed as mean ± SD for parametric data distribution or median and interquartile range for non-parametric data. Statistical analysis was performed using one-way ANOVA followed by Tukey’s multiple-comparison test or Kruskal-Wallis followed by Dunn’s test. Different lowercase letters indicate significant differences between groups (*p* < 0.05).

**Table S5.** Exploratory behaviour of 120 hpf eleutheroembryo exposed to *Equisetum arvense* extract.

| Test Parameter                | Exposure Group |               |              |               | Statistical Test | p-Value |
|-------------------------------|----------------|---------------|--------------|---------------|------------------|---------|
|                               | Ctrl           | E1            | E2           | E3            |                  |         |
| Speed (cm min <sup>-1</sup> ) | 8.1 ± 1.9      | 8.2 ± 0.7     | 8.6 ± 0.3    | 7.9 ± 2.3     | F(3,16) = 0.222  | 0.879   |
| Distance moved (cm)           | 234.9 ± 106.9  | 297.2 ± 74.38 | 340.8 ± 41.8 | 218.1 ± 100.3 | F(3,16) = 2.254  | 0.124   |
| Distance to centre (cm)       | 1.3 ± 0.2      | 1.2 ± 0.1     | 1.2 ± 0.1    | 1.2 ± 0.1     | F(3,16) = 0.680  | 0.577   |
| Active (%)                    | 46.5 ± 15.1    | 32.7 ± 5.2    | 31.3 ± 2.2   | 39.9 ± 12.0   | F(3,16) = 2.429  | 0.103   |
| Absolute turn angle (°)       | 7.7 ± 2.3      | 8.3 ± 0.7     | 9.0 ± 0.6    | 8.8 ± 3.0     | F(3,16) = 0.460  | 0.714   |

Data from five independent replicates expressed as mean ± SD. Statistical analysis was performed using one-way ANOVA followed by Tukey’s multiple-comparison test (*p* < 0.05).

**Table S6.** Exploratory behaviour of 120 hpf eleutheroembryo exposed to *Mimosa tenuiflora* extract.

| Test Parameter                | Exposure Group |             |               |              | Statistical Test | p-Value |
|-------------------------------|----------------|-------------|---------------|--------------|------------------|---------|
|                               | Ctrl           | M1          | M2            | M3           |                  |         |
| Speed (cm min <sup>-1</sup> ) | 7.5 ± 3.0      | 5.6 ± 2.1   | 7.5 ± 3.4     | 7.3 ± 2.0    | F(3,16) = 0.434  | 0.732   |
| Distance moved (cm)           | 196.0 ± 126.9  | 83.5 ± 62.1 | 152.7 ± 100.2 | 161.4 ± 88.0 | F(3,16) = 0.965  | 0.439   |
| Distance to centre (cm)       | 1.2 ± 0.1      | 1.0 ± 0.2   | 1.1 ± 0.1     | 1.1 ± 0.2    | F(3,16) = 0.791  | 0.517   |
| Active (%)                    | 42.9 ± 15.1    | 59.9 ± 14.9 | 41.8 ± 18.3   | 54.1 ± 12.6  | F(3,16) = 1.629  | 0.222   |
| Absolute turn angle (°)       | 9.9 ± 2.4      | 5.7 ± 1.4   | 9.0 ± 4.3     | 6.5 ± 1.9    | F(3,16) = 2.631  | 0.091   |

Data from five independent replicates expressed as mean ± SD. Statistical analysis was performed using one-way ANOVA followed by Tukey's multiple-comparison test ( $p < 0.05$ ).

**Table S7.** Exploratory behaviour of 120 hpf eleutheroembryo exposed to Thymol.

| Test Parameter                | Exposure Group |               |              |               | Statistical Test | p-Value |
|-------------------------------|----------------|---------------|--------------|---------------|------------------|---------|
|                               | Ctrl           | T1            | T2           | T3            |                  |         |
| Speed (cm min <sup>-1</sup> ) | 7.4 ± 3.0      | 8.1 ± 2.8     | 8.2 ± 2.3    | 7.3 ± 2.1     | F(3,16) = 0.158  | 0.923   |
| Distance moved (cm)           | 138.9 ± 107.2  | 155.6 ± 130.9 | 154.4 ± 54.5 | 140.3 ± 108.0 | F(3,16) = 0.071  | 0.975   |
| Distance to centre (cm)       | 1.2 ± 0.1      | 1.2 ± 0.1     | 1.2 ± 0.2    | 1.2 ± 0.2     | F(3,16) = 0.337  | 0.799   |
| Active (%)                    | 53.2 ± 26.9    | 66.1 ± 26.2   | 38.8 ± 18.7  | 54.7 ± 12.4   | F(3,16) = 1.310  | 0.306   |
| Absolute turn angle (°)       | 8.3 ± 4.2      | 8.5 ± 4.4     | 7.7 ± 1.7    | 8.0 ± 1.2     | F(3,16) = 0.065  | 0.978   |

Data from five independent replicates expressed as mean ± SD. Statistical analysis was performed using one-way ANOVA followed by Tukey's multiple-comparison test ( $p < 0.05$ ).
